# Supplementary material
Source: Springer Nature journal article supplement (https://www.springermedizin.de/resource/supplementary/12876_2011_679_MOESM1_ESM.pdf/9437212)

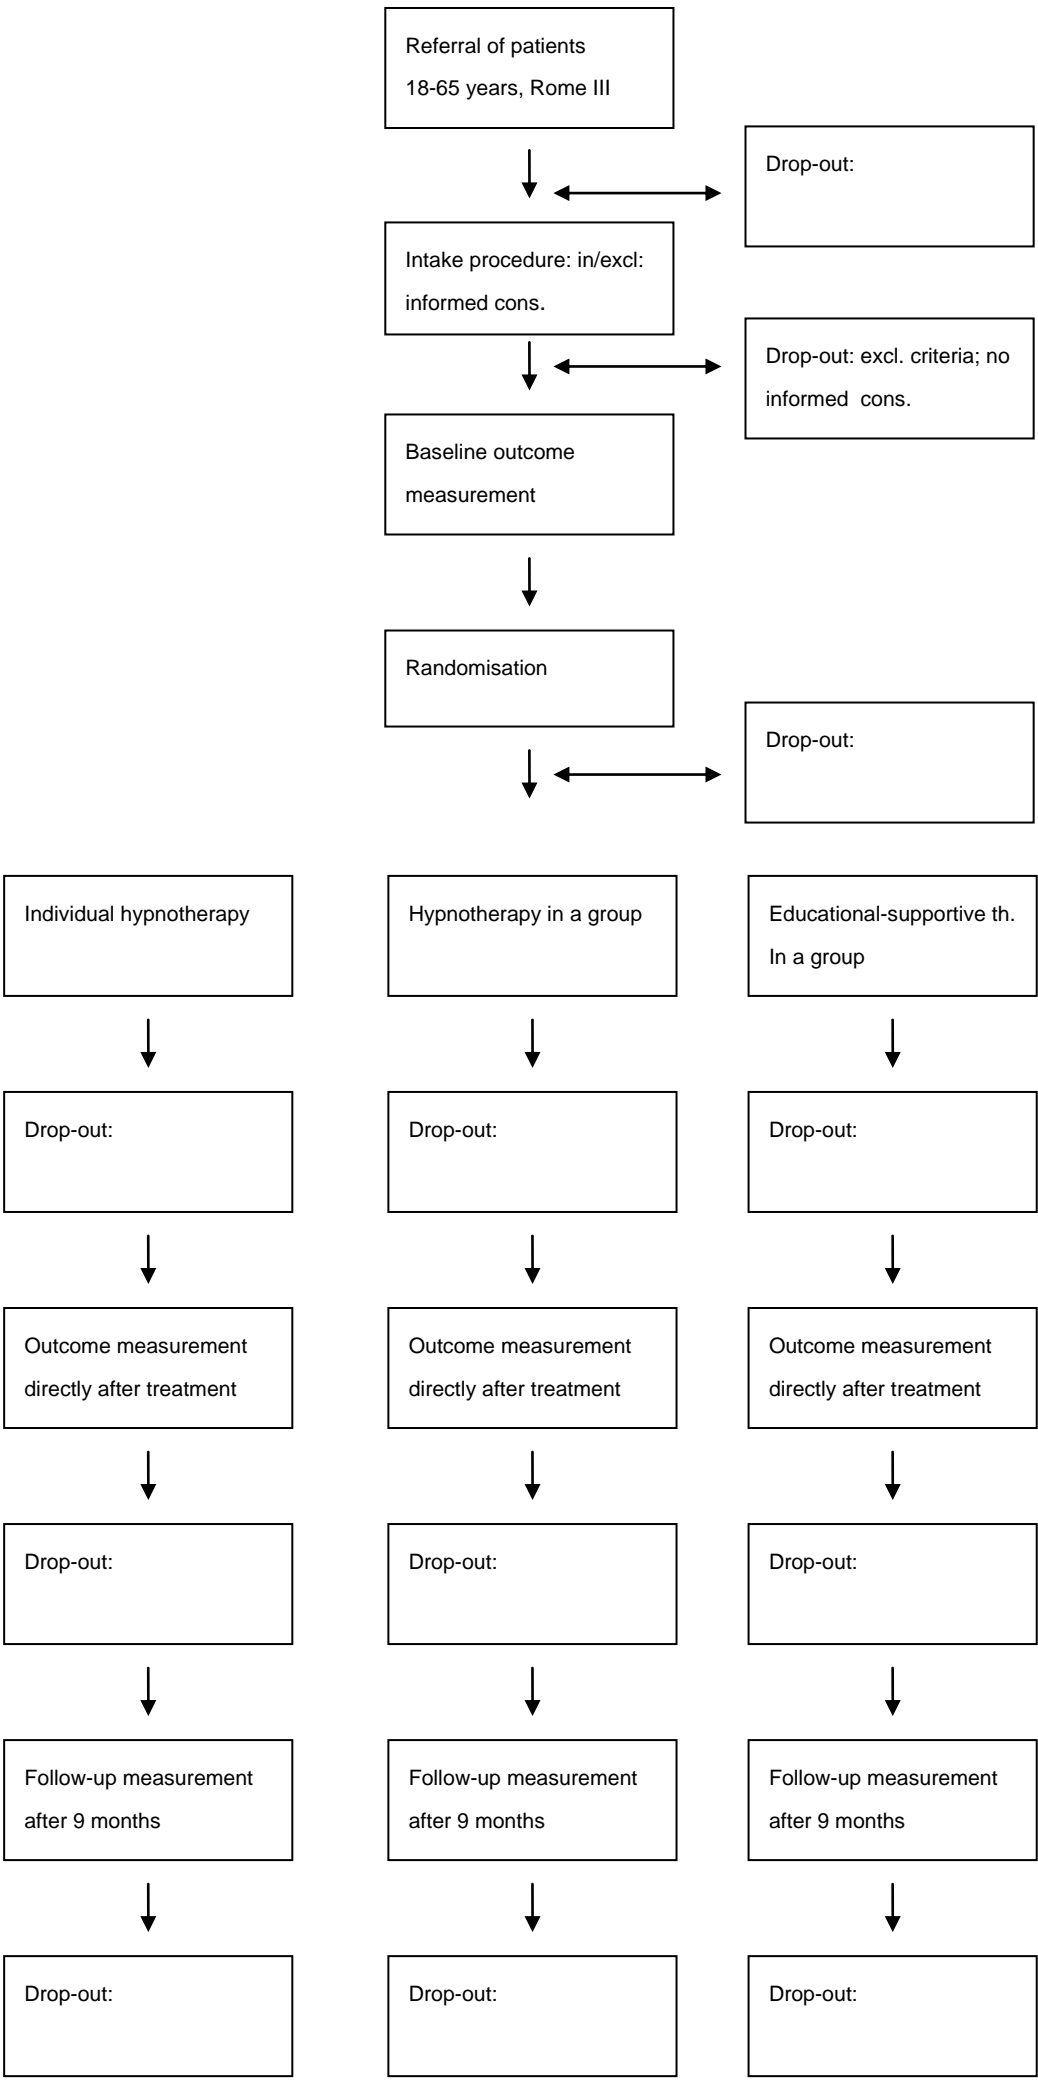

Supplement: MOESM1 [file 9437212]
